# Supplementary material for: Colorectal cancer pre-diagnostic symptoms are associated with anatomic cancer site
Source: Springer Nature journal article supplement (doi:10.1186/s12876-024-03152-8), 2024-02-06

Additional file 1

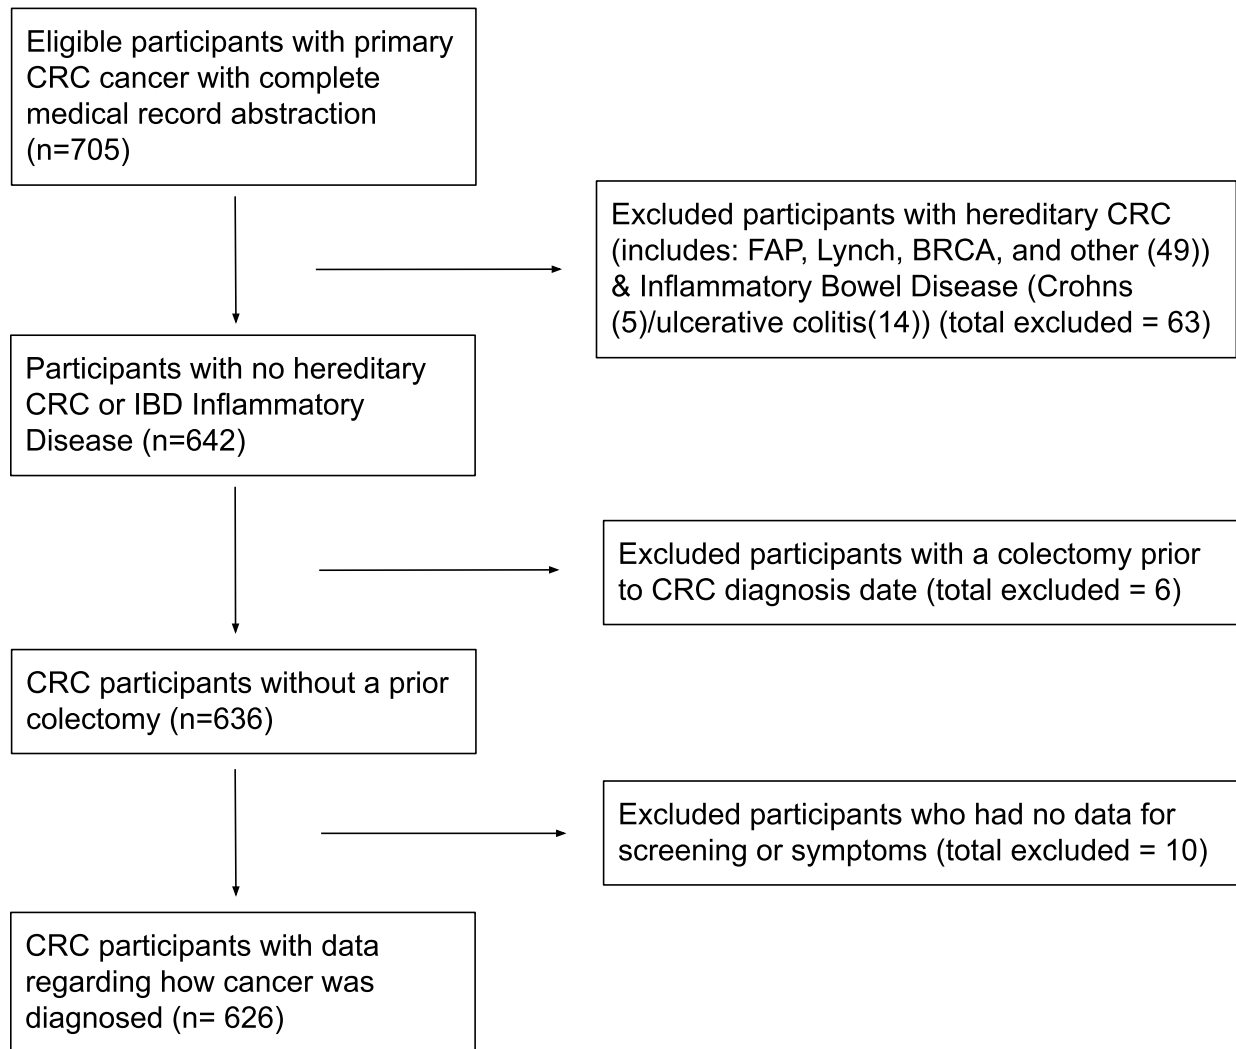

Supplement: MOESM1 [file 26706552]
