# Supplementary material for: Colorectal cancer pre-diagnostic symptoms are associated with anatomic cancer site
Source: Springer Nature journal article supplement (doi:10.1186/s12876-024-03152-8), 2024-02-06
Supplement: MOESM2 [file 26706552]

Additional file 2

|                  | <b>All ages (N = 626)</b>               | <b>Age ≥ 50years (N = 510)</b>          |
|------------------|-----------------------------------------|-----------------------------------------|
| <b>Symptom</b>   | <b>Adjusted OR (95% CI)<sup>a</sup></b> | <b>Adjusted OR (95% CI)<sup>a</sup></b> |
| Blood in Stool   | 4.37 (3.02, 6.33)*                      | 3.86 (2.55, 5.84)*                      |
| Changes to Stool | 1.78 (1.21, 2.60)*                      | 1.81 (1.15, 2.83)*                      |
| Abdominal Pain   | 0.30 (0.19, 0.47)*                      | 0.38 (0.22, 0.63)*                      |
| Anemia           | 0.40 (0.21, 0.75)*                      | 0.49 (0.24, 0.98)*                      |
| Other Symptoms   | 0.33 (0.19, 0.55)*                      | 0.45 (0.24, 0.83)*                      |
| Asymptomatic     | 0.68 (0.44, 1.04)                       | 0.62 (0.39, 0.97)*                      |

<sup>a</sup>Adjusted for age at diagnosis (years), sex (male, female), diabetes (yes, no), BMI (kg/m<sup>2</sup>), cancer stage (localized, regional, distant), race/ethnicity (white, people of color)

\*Statistically significant (p-value < 0.05)
